# Supplementary material for: Novel Salmonella Phage, vB_Sen_STGO-35-1, Characterization and Evaluation in Chicken Meat
Source: MDPI journal article supplement (doi:10.3390/microorganisms10030606), 2022-03-12
Supplement: s1 [file s1]

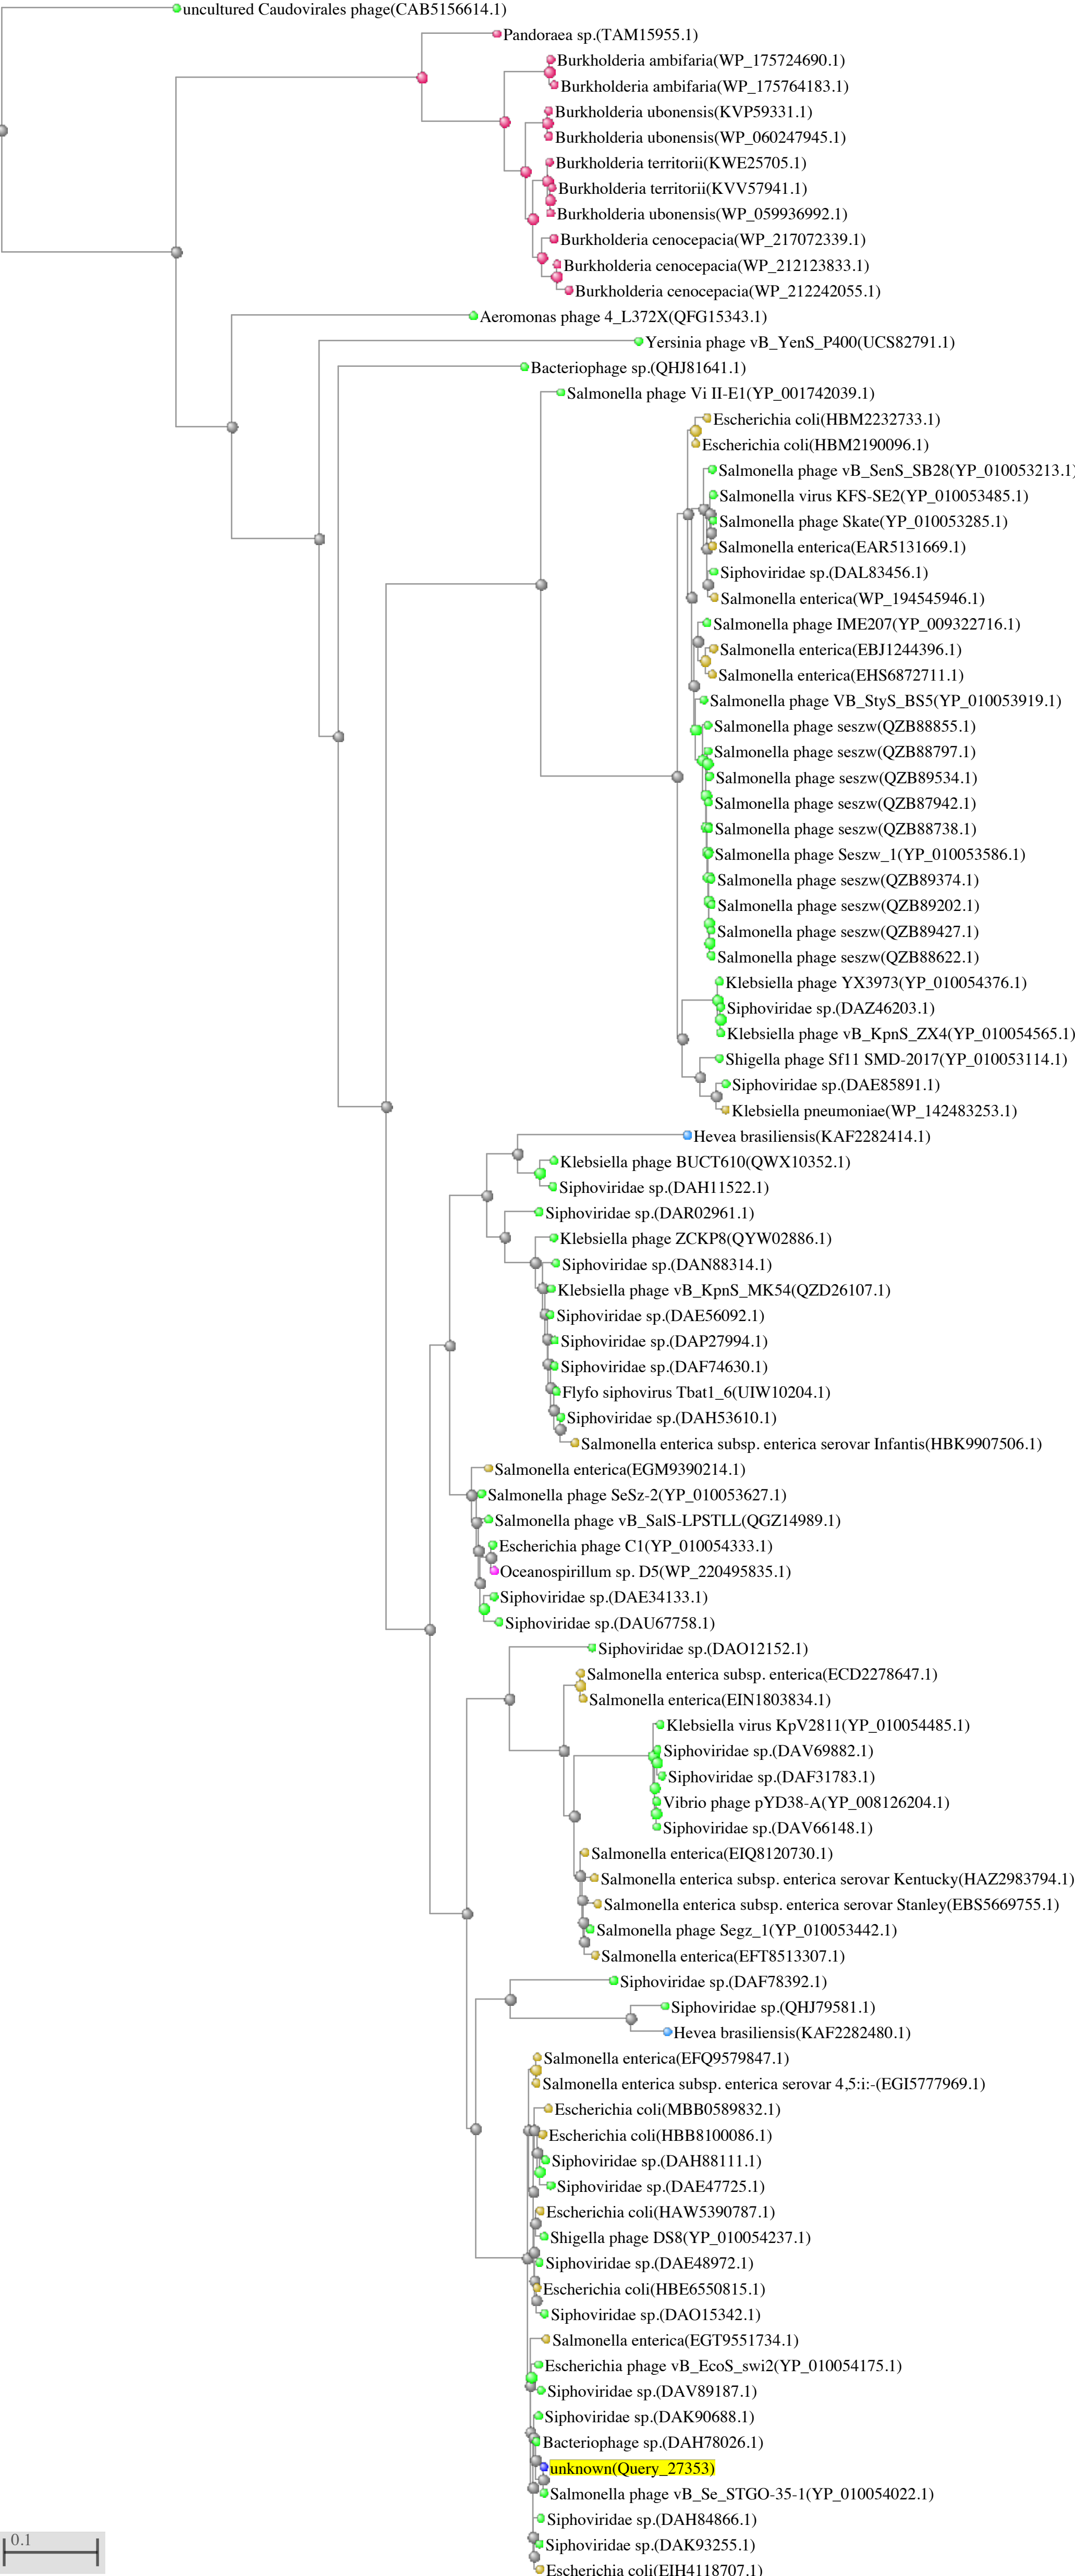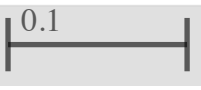

**Figure S4.** The terminase phylogenetic tree was constructed to describe the closeness between amino acid sequences of long terminase from different phages. Blast names correspond to informal high-level taxonomic categories and the NCBI accession ID. Yellow squares represent of the terminal node indicating the blast name of the sequence. This analysis was performed with COBALT using the algorithm given by neighbor joining.
