# Supplementary material for: Novel Salmonella Phage, vB_Sen_STGO-35-1, Characterization and Evaluation in Chicken Meat
Source: MDPI journal article supplement (doi:10.3390/microorganisms10030606), 2022-03-12
Supplement: s1 [file s1]

**Table S1.** List of *Salmonella* isolates used for phage host range characterization.

| <i>Salmonella</i> ID <sup>1</sup> | Origin     | Serogroup | Serovar                          | Phage-sensitive strains <sup>3</sup> |
|-----------------------------------|------------|-----------|----------------------------------|--------------------------------------|
| FSL A4-525                        | US-bovine  | E1        | Anatum                           | No                                   |
| FSL R8-798                        | US-human   | W         | Weltevreden                      | No                                   |
| FSL S5-961                        | US-human   | C1        | Virchow                          | No                                   |
| FSL S5-369                        | US-human   | B         | Saintpaul                        | No                                   |
| FSL R8-092                        | US-human   | C2-C3     | Corvalis                         | No                                   |
| FSL A4-793                        | US-bovine  | E1        | Mbandaka                         | No                                   |
| FSL S5-464                        | US-human   | B         | Stanley                          | No                                   |
| FSL S5-373                        | US-human   | C1        | Braenderup                       | Yes <sup>4</sup>                     |
| FSL A4-737                        | US-bovine  | B         | Typhimurium                      | No                                   |
| FSL S5-515                        | US-human   | C2        | Newport                          | No                                   |
| FSL S5-474                        | US-human   | C1        | Montevideo                       | No                                   |
| FSL S5-917                        | US-bovine  | E1        | Muenster                         | No                                   |
| FSL S5-431                        | US-bovine  | C2-C3     | Kentucky                         | No                                   |
| FSL S5-548                        | US-bovine  | C2        | Newport                          | No                                   |
| FSL S5-370                        | US-human   | B         | Typhimurium                      | No                                   |
| FSL S5-506                        | US-human   | C1        | Infantis                         | No                                   |
| FSL A4-737                        | US-bovine  | B         | Typhimurium                      | No                                   |
| FSL S5-454                        | US-human   | D         | Panama                           | Yes <sup>4</sup>                     |
| FSL R8-376                        | US-animal  | C1        | Oranienburg                      | No                                   |
| FSL R9-1343                       | US-porcine | C1        | Choleraesuis                     | No                                   |
| FSL S5-667                        | US-human   | B         | Agona                            | Yes <sup>4</sup>                     |
| FSL S5-455                        | US-human   | B         | Heidelberg                       | No                                   |
| FSL S5-406                        | US-human   | D1        | Javiana                          | No                                   |
| FSL S5-371                        | US-human   | D1        | Enteritidis (DR028) <sup>2</sup> | Yes <sup>4</sup>                     |
| FSL S5-368                        | US-bovine  | D1        | Dublin                           | No                                   |
| FSL S5-390                        | US-human   | B         | 4,5,12:i:-                       | No                                   |

(1) *Salmonella* isolates were obtained from the Food Safety Laboratory (FSL; Cornell University, Ithaca, NY)

(2) Host for isolation

(3) These bacteria were sensitive to the phage vB\_Sen\_STGO-35-1

(4) Characterization of phage host range by spotting soft agar (0.7% TSA). Plates were incubated for 16 to 18 h at 37°C and then examined for lysis (either present or not present) considering clean and turbid plaques= presence of lysis, and absence of plaques= no lysis. Experiments were performed in two independent replicates.
