# Supplementary material for: Novel Salmonella Phage, vB_Sen_STGO-35-1, Characterization and Evaluation in Chicken Meat
Source: MDPI journal article supplement (doi:10.3390/microorganisms10030606), 2022-03-12
Supplement: s1 [file s1]

**Table S4.** Relatedness and taxonomical classification of similar *Siphoviridae* sequence of phages obtained by JSpeciesWS.

| Genome                                | Accession   | ANiB [%]     | Aligned [%]  | Aligned [bp] | ANiB x Aligned [%] |
|---------------------------------------|-------------|--------------|--------------|--------------|--------------------|
| Klebsiella phage vB_KpnS_ZX4          | NC_054654.1 | 72.50        | 46.82        | 1402         | 35.34              |
| Klebsiella phage BUCT541              | MZ836210.1  | 72.91        | 42.79        | 2338         | 31.19              |
| Shigella phage Sf11_SMD-2017          | NC_054636.1 | 83.45        | 43.29        | 20556        | 36.13              |
| Salmonella_virus_VSt472               | NC_054644.1 | 83.96        | 53.57        | 25436        | 44.98              |
| Salmonella phage Skate                | NC_054639.1 | 84.33        | 55.41        | 26310        | 46.73              |
| Salmonella phage IME207               | KX523699.2  | 84.40        | 49.37        | 23442        | 41.67              |
| <b>Salmonella phage KFS-SE2(*)</b>    | NC_054641.1 | <b>84.81</b> | <b>53.22</b> | <b>25272</b> | <b>45.14</b>       |
| Salmonella phage vB_SenS_SB28         | NC_054638.1 | 84.96        | 54.28        | 14507        | 33.62              |
| Salmonella phage VB_StyS_BS5          | NC_054646.1 | 85.47        | 63.02        | 17309        | 53.86              |
| Salmonella phage_LPST10               | NC_054645.1 | 85.72        | 57.02        | 27074        | 48.88              |
| Salmonella phage Vi II-E1             | AM491472.1  | 85.78        | 45.43        | 21570        | 38.97              |
| <b>Salmonella phage_64795_sal3(*)</b> | KX017520.1  | <b>85.92</b> | <b>49.43</b> | <b>23471</b> | <b>42.47</b>       |
| Salmonella phage vB_SalS-LPSTLL       | MN737551.1  | 86.76        | 62.07        | 17702        | 53.85              |
| Salmonella phage seszw                | MZ375232.1  | 86.79        | 61.20        | 18800        | 53.11              |
| E. coli phage vB_EcoS-Sa179lw         | NC_054637.1 | 86.97        | 39.58        | 18795        | 34.42              |
| Escherichia phage vB_EcoS_swi2        | NC_054649.1 | 87.23        | 68.17        | 22434        | 59.46              |
| Salmonella phage D10                  | MZ489634.1  | 87.34        | 69.28        | 21530        | 60.50              |
| Escherichia phage C1                  | NC_054651.1 | 87.84        | 56.95        | 27042        | 50.02              |
| Shigella phage DS8                    | NC_054650.1 | 87.89        | 52.39        | 24877        | 46.05              |
| <b>Salmonella phage Akira(*)</b>      | NC_054647.1 | <b>88.53</b> | <b>54.15</b> | <b>25712</b> | <b>47.94</b>       |

In gray, the phages closest to the study phage STGO-35-1 are highlighted.

(\*) These phages are represented within the phylogenetic analysis in Figure 4 in the large cluster STGO-35-1.
