# Supplementary material for: Novel Salmonella Phage, vB_Sen_STGO-35-1, Characterization and Evaluation in Chicken Meat
Source: MDPI journal article supplement (doi:10.3390/microorganisms10030606), 2022-03-12
Supplement: s1 [file s1]

A. Alignment of amino acid sequences present on Tailspike (gp65) STGO 35-1 phage and Salmonella phage P22 tail-spike 2FNA/A, was analysis by using CLUSTAL O version 1.2.4 (Sievers and Higgins, 2014).

```

pdb|2VFN|A      ----- 0
Tailspike      MATTPTSLSPISEDPRDLKFNAGKFDEVMTSDAHYYVDRFGVKRWTIAGFQYTAEEAIRA 60

pdb|2VFN|A      ----- 0
Tailspike      YGYITMDSFEDGATLTLPNQVLRYEATGEYYRWDGAFPKAVAAGSTPASTGGVGLGAWIS 120

pdb|2VFN|A      MDPDQYSIEADKKFKYSAKLSDYPTLQDAASAADVGLLIDRDYNYFYGGETVDFGGKVLTII 60
Tailspike      VGDAAFRQEANKKFKYSVKLSDYSTLQEAATAAVDGVLLIDRDYTFDTNETVDFGGKVLTII 180
                :.      :   **:*****.*****   **:**:*****:*****.*   ..*****

pdb|2VFN|A      ECKAKFIGDGNLIFTKLKGKSRIAGVFMESTTTPWVIKPWTDNQNWLTDAAAVVATLKQS 120
Tailspike      DCKAKFIGDGNLFTNLGAGSLVNSPYMESATTPWVIKPWTDNQNWITDPAAVVATLKQS 240
                :*****   **:**   :   .   :***:*****:*****:.* *****

pdb|2VFN|A      KTDGYQPTVSDYVKFPGIETLLPPNAKQNIITSTLEIRECIGVEVHRASGLMAGFLFRGC 180
Tailspike      KTDGYQPTVNDYAKFPGIESLLPPEAKDQNISSVLEIRECTGVEVHRASGLMACFLFRRC 300
                *****.*.*****:****:*.***:*.***** ***** *****

pdb|2VFN|A      HFCKMVDANNPSGGKDGIIITFENLSGDWKGNYVIGGRTSYGSVSSAQFLRNNGGFERDG 240
Tailspike      HFCKMIDADNPITGGKDGVIITFENLSGDWKGNYVIGGRTSYGSVSSAQFLRNNGGFARDG 360
                *****:*.** *****:*****:*****:***** *****

pdb|2VFN|A      GVIGFTSYRAGESGVKTWQGTVGSTTSRNYNLQFRDSVVIYPVWDGFDLGADTDMNPELD 300
Tailspike      GVIGFTSYRAGESGVKTWQGSVGSSTARNYNLQFRDSVVIYPVWEGFDLGADTDMNPEDD 420
                *****:*****:*.***:*.*****:*****:*****:*****

pdb|2VFN|A      RPGDYPIITQYPLHQLPLNHLIDNLLVRGALGVGFGMDGKGMVYSNITVEDCAGSGAYLLT 360
Tailspike      RPGDFPFSQYPVHMLPLNHLIDNLLVRGSLGVGFGMDGKGLYVSNITVEDCAGSGAYILA 480
                ***:*.***:*. *****:*****:*****:*****:*****:*.

pdb|2VFN|A      HESVFTNIAIIDTNTKDFQANQIYISGACRVNGLRLIGIRSTDGQSLTIDAPNSTVSGIT 420
Tailspike      HETVFTNIAIIDTNTKNFPANQIYISGACRVNGLRLVGIRSTNEQGLTIDAPNSTVSGIT 540
                **:*****:*. *****:*****:*****:*. *****

pdb|2VFN|A      GMVDPSRINVANLAEEGLGNIRANSFGYDSAAIKLRIHKLSKTLD SGALYSHINGGAGSG 480
Tailspike      GLVDPSRINVANLADEGLGNTRINSFNDSAAQLRIHKLTKTLD SGAVYSHINGGPGSG 600
                *:*****:***** * ** . ***:*****:*****:***** ***

pdb|2VFN|A      SAYTQLTAISGSTPDAVSLKVNHKDCRGAIEIPFVPDIASDDFIKDSSCFLLPYWENNSTSL 540
Tailspike      SAWTEITAISSLTPDAVSLKINRGDYRAVEIPVAMSPLPENAVRDIGSISMYLEG--DSL 658
                **:***:***** *****:*. * *.***. . . :. :.* ..: * * . **

pdb|2VFN|A      KALVKKPNGELVRLTLATLL 560
Tailspike      KALVRRADGSYTRLTLA--- 675
                *****:*. .*****

```

Match sequence (\*) marked in red and in blue different sequence.

**B. Conserved domains on PhageP22-tail [lcl|Query\_16388] (Marchler-Bauer et al., 2015).**

| Name          | Accession                 | Description                     | Interval | E-value |
|---------------|---------------------------|---------------------------------|----------|---------|
| PhageP22-tail | <a href="#">pfam09251</a> | Salmonella phage P22 tail-spike | 79-274   | 0e+00   |

**Pssm-ID: 312676 Cd Length: 550 Bit Score: 632.91 E-value: 0e+00**

|               |     |                |                |             |                 |                                |                        |               |                              |                       |               |               |     |
|---------------|-----|----------------|----------------|-------------|-----------------|--------------------------------|------------------------|---------------|------------------------------|-----------------------|---------------|---------------|-----|
|               |     |                | 10             | 20          | 30              | 40                             | 50                     | 60            | 70                           | 80                    |               |               |     |
| Query_16388   | 6   | FKYSVKLSDYSTLQ | EAATAAVDGV     | LIDRDYTF    | TDNETVD         | FGGKVLTI                       | DC                     | KA            | FIGDGNLT                     | FTNLGAGSLVNSPYMESATT  | 85            |               |     |
| Cdd:pfam09251 | 7   | FKYSVKLSDYPTLQ | DAASAADVGL     | LIDRDYNY    | FGGETVD         | FGGKVLTI                       | E                      | C             | KAFIGDGNLT                   | IFTKLKGSR             | IAGVFMES      | TTT           | 86  |
|               |     | 90             | 100            | 110         | 120             | 130                            | 140                    | 150           | 160                          |                       |               |               |     |
| Query_16388   | 86  | PWVIKPWTDN     | QWITDPA        | AVVATLKQSKT | DGYQPTV         | NDYAKFPGIES                    | LLPPEAKDQNI            | SSVLEIRECT    | GVEVHRASGLMA                 | 165                   |               |               |     |
| Cdd:pfam09251 | 87  | PWVIKPWTDN     | QWLTDA         | AVVATLKQSKT | DGYQPTVSDVY     | KFPGIETLLP                     | PNAGQNI                | TS            | LEIRECT                      | GVEVHRASGLMA          | 166           |               |     |
|               |     | 170            | 180            | 190         | 200             | 210                            | 220                    | 230           | 240                          |                       |               |               |     |
| Query_16388   | 166 | CFLFRRCHFC     | KMIDAN         | PIGGK       | DGVI            | TFENLSGD                       | WGKGNV                 | VIGGR         | TSYGSVSSAQFLRN               | NGGFARDG              | GVIGFTSYRAGES | 245           |     |
| Cdd:pfam09251 | 167 | GFLFRGCHFC     | KMVDAN         | NP          | SGGKDGI         | I                              | TFENLSGD               | WGKGNV        | VIGGR                        | TSYGSVSSAQFLRN        | NGGFERD       | GVIGFTSYRAGES | 246 |
|               |     | 250            | 260            | 270         | 280             | 290                            | 300                    | 310           | 320                          |                       |               |               |     |
| Query_16388   | 246 | GVKTWQGS       | VGSTARNYNL     | QFRDSV      | LYPVW           | EGFDL                          | GADTDMNP               | EDDRPGDF      | PFSSQYYP                     | HMLPLNHLIDNLLVRGSLGVG | 325           |               |     |
| Cdd:pfam09251 | 247 | GVKTWQGT       | VGSTTSRNYNL    | QFRDSV      | IYPVW           | DGFDL                          | GADTDMNP               | ELDRPGDY      | PITQYPLHQLPLNHLIDNLLVRGALGVG | 326                   |               |               |     |
|               |     | 330            | 340            | 350         | 360             | 370                            | 380                    | 390           | 400                          |                       |               |               |     |
| Query_16388   | 326 | FGMDGKGLYVSN   | ITVEDCAGSGAYIL | AHETVFTN    | IAI             | IDTNTKNF                       | PANQIYISGACRVNGLRLVGIR | STNEQGLTIDAPN | 405                          |                       |               |               |     |
| Cdd:pfam09251 | 327 | FGMDGKGMVYSN   | ITVEDCAGSGAYLL | THESVFTN    | IAI             | IDTNTKDFQANQIYISGACRVNGLRLIGIR | STDGQGLTIDAPN          | 406           |                              |                       |               |               |     |
|               |     | 410            | 420            | 430         | 440             | 450                            | 460                    |               |                              |                       |               |               |     |
| Query_16388   | 406 | STVSGITGLVDPS  | RINVANLADEGLGN | TRIN        | SFNNDSAA        | LQLRIHKLTK                     | TLDSGAVYSHINGGPGSG     | 472           |                              |                       |               |               |     |
| Cdd:pfam09251 | 407 | STVSGITGMVDPS  | RINVANLAEEGLGN | IRANS       | FGYDSAAIKLRIHKL | SKTLDSGALYSHINGGAGSG           | 473                    |               |                              |                       |               |               |     |

**Figure S1.** Alignment of amino acid sequences of the tailspike (gp65), STGO 35-1 phage, and super families and putative conserved domains of P22 tail (pfam09251);

Match sequence (\*) marked in red and in blue different sequence.
