# Supplementary material for: Novel Salmonella Phage, vB_Sen_STGO-35-1, Characterization and Evaluation in Chicken Meat
Source: MDPI journal article supplement (doi:10.3390/microorganisms10030606), 2022-03-12
Supplement: s1 [file s1]

**Table S3.** Annotated CDS of wild-type *Salmonella* vB\_Sen\_STGO-35-1, phage, including product, predicted function, and functional category of genes.

| Colour key | CDS No. | Position (nt) |      | Length bp | Product (b)                                            | Predicted function                     | Functional Category  | MS spectrometry               |                              |
|------------|---------|---------------|------|-----------|--------------------------------------------------------|----------------------------------------|----------------------|-------------------------------|------------------------------|
|            |         | Start         | Stop |           |                                                        |                                        |                      | Protein molecular weight (Da) | Percentage sequence coverage |
|            | 1       | 1             | 1425 | 1425      | Phage terminase, large subunit                         | Endonuclease, Hydrolase, Nuclease      | DNA genome packaging | –                             | –                            |
|            | 2 (c)   | 1458          | 2054 | 597       | Hypothetical protein                                   | Unknown                                | Hypothetical         | –                             | –                            |
|            | 3       | 2228          | 2434 | 207       | Hypothetical protein                                   | Unknown                                | Hypothetical         | –                             | –                            |
|            | 4       | 2438          | 2605 | 168       | hypothetical protein                                   | Unknown                                | Hypothetical         | –                             | –                            |
|            | 5       | 2605          | 2793 | 189       | Hypothetical protein                                   | Unknown                                | Hypothetical         | –                             | –                            |
|            | 6       | 2793          | 3011 | 219       | Hypothetical protein                                   | Unknown                                | Hypothetical         | –                             | –                            |
|            | 7       | 3011          | 3172 | 162       | Hypothetical protein                                   | Unknown                                | Hypothetical         | –                             | –                            |
|            | 8       | 3182          | 3376 | 195       | Hypothetical protein                                   | Unknown                                | Hypothetical         | –                             | –                            |
|            | 9       | 3376          | 3642 | 267       | Hypothetical protein                                   | Unknown                                | Hypothetical         | –                             | –                            |
|            | 10      | 3690          | 5093 | 1404      | Capsid protein/Phage portal (connector) protein (a, b) | Genome packaging, neck/tail attachment | Structure            | 52.523,30                     | 31,51%                       |
|            | 11      | 5074          | 6030 | 957       | Capsid protein /Putative head assembly protein (a, b)  | Assembly                               | Structure            | 35.410,90                     | 20,80%                       |
|            | 12      | 6121          | 7023 | 903       | Hypothetical protein                                   | Unknown                                | Unknown              | –                             | –                            |
|            | 13 (c)  | 7078          | 7377 | 300       | Hypothetical protein                                   | Unknown                                | Unknown              | –                             | –                            |
|            | 14 (c)  | 7374          | 7643 | 270       | Hypothetical protein                                   | Unknown                                | Unknown              | –                             | –                            |
|            | 15 (c)  | 7652          | 7795 | 144       | Hypothetical protein                                   | Unknown                                | Unknown              | –                             | –                            |

|  |        |       |       |      |                                                    |                       |                       |           |        |
|--|--------|-------|-------|------|----------------------------------------------------|-----------------------|-----------------------|-----------|--------|
|  | 16 (c) | 7798  | 8076  | 279  | Hypothetical protein                               | Unknown               | Unknown               | -         | -      |
|  | 17     | 8180  | 8458  | 279  | Phage lysozyme (b)                                 | Phage lysozyme        | Structure             | -         | -      |
|  | 18     | 8448  | 8912  | 465  | Phage lysozyme R (a, b)                            | Unknown               | Unknown               | 16.867,30 | 11,70% |
|  | 19     | 8909  | 9148  | 240  | Putative holin                                     | Unknown               | Unknown               | -         | -      |
|  | 20     | 9132  | 9620  | 489  | DUF2514 family( scaffold 56 gp20) (a, b)           | Unknown               | Structure             | 17.658,20 | 5,56%  |
|  | 21 (c) | 9655  | 9900  | 246  | Hypothetical protein                               | Unknown               | Unknown               | -         | -      |
|  | 22 (c) | 10026 | 10334 | 309  | Hypothetical protein                               | Unknown               | Unknown               | -         | -      |
|  | 23 (c) | 10334 | 10756 | 423  | Hypothetical protein                               | Unknown               | Unknown               | -         | -      |
|  | 24 (c) | 10783 | 10977 | 195  | Hypothetical protein/Holin (b)                     | Unknown               | Unknown               | -         | -      |
|  | 25     | 11077 | 11280 | 204  | Hypothetical protein                               | Unknown               | Unknown               | -         | -      |
|  | 26     | 11291 | 11485 | 195  | Hypothetical protein                               | Unknown               | Unknown               | -         | -      |
|  | 27     | 11482 | 11796 | 315  | Hypothetical protein                               | Unknown               | Unknown               | -         | -      |
|  | 28     | 11793 | 12038 | 246  | Restriction allevation                             | DNA genome metabolims | DNA genome metabolims | -         | -      |
|  | 29     | 12028 | 12516 | 489  | Hypothetical protein                               | Unknown               | Unknown               | -         | -      |
|  | 30     | 12642 | 13022 | 381  | Phage coat protein (cytosine-specific DNA(gp7) (b) | Unknown               | Unknown               | -         | -      |
|  | 31     | 13019 | 13330 | 312  | Hypothetical protein                               | Unknown               | Unknown               | -         | -      |
|  | 32     | 13452 | 13598 | 147  | Hypothetical protein                               | Unknown               | Unknown               | -         | -      |
|  | 33     | 13792 | 15078 | 1287 | Phage coat /Capside protein (a, b)                 | Unknown               | Structure             | 47.220,20 | 4,91%  |
|  | 34     | 15078 | 15545 | 468  | Putative capsid decoration (a, b)                  | Unknown               | Structure             | 15.858,90 | 16,10% |
|  | 35     | 15548 | 16618 | 1071 | Phage coat protein/major capsid protein (a, b)     | Unknown               | Structure             | 39.761,20 | 40,72% |

|  |        |       |       |     |                                                      |                                                         |                       |           |        |
|--|--------|-------|-------|-----|------------------------------------------------------|---------------------------------------------------------|-----------------------|-----------|--------|
|  | 36     | 16661 | 17008 | 348 | Hypothetical protein                                 | Unknown                                                 | Unknown               | -         | -      |
|  | 37     | 17001 | 17198 | 198 | Hypothetical protein                                 | Unknown                                                 | Unknown               | -         | -      |
|  | 38     | 17239 | 18057 | 819 | Hypothetical protein (a, b)                          | Unknown                                                 | Structure             | 28.848,30 | 24,60% |
|  | 39 (c) | 18085 | 18444 | 360 | Phage protein                                        | Unknown                                                 | Unknown               | -         | -      |
|  | 40 (c) | 18444 | 18983 | 540 | Hypothetical protein                                 | Unknown                                                 | DNA genome metabolims | -         | -      |
|  | 41 (c) | 18983 | 19156 | 174 | DNA polymerase III/ putative structural protein (b)  | Unknown                                                 | Unknown               | -         | -      |
|  | 42 (c) | 19153 | 19398 | 246 | Hypothetical protein                                 | Unknown                                                 | Unknown               | -         | -      |
|  | 43 (c) | 19395 | 20207 | 813 | Phage protein/ putative trascriptional regulator (b) | DNA genome metabolims                                   | DNA genome metabolims | -         | -      |
|  | 44 (c) | 20204 | 20485 | 282 | Hypothetical protein                                 | Unknown                                                 | Unknown               | -         | -      |
|  | 45 (c) | 20487 | 20678 | 192 | Hypothetical protein/ phage fibrin(wac) protein      | Unknown                                                 | Unknown               | -         | -      |
|  | 46 (c) | 20682 | 21305 | 624 | Phage protein/ Phage EaC protein (b)                 | Unknown                                                 | Unknown               | -         | -      |
|  | 47     | 21423 | 21542 | 120 | Hypothetical protein                                 | Unknown                                                 | Unknown               | -         | -      |
|  | 48     | 21542 | 21982 | 441 | Hypothetical protein                                 | Unknown                                                 | Unknown               | -         | -      |
|  | 49     | 22015 | 22299 | 285 | Hypothetical protein/ phage tail tape measure (b)    | Unknown                                                 | Unknown               | -         | -      |
|  | 50     | 22316 | 22672 | 357 | Phage protein                                        | Unknown                                                 | Unknown               | -         | -      |
|  | 51     | 22669 | 23010 | 342 | Minor capsid protein (gp51) (a, b)                   | Packaging of viral DNA                                  | Structure             | 12.385,00 | 9,73%  |
|  | 52     | 23010 | 23408 | 399 | Minor capsid protein (gp52) (a, b)                   | Packaging of viral DNA                                  | Structure             | 14.814,80 | 15,20% |
|  | 53     | 23405 | 23779 | 375 | Minor capsid protein (gp53) (a, b)                   | Unknown                                                 | Structure             | 14.009,10 | 9,68%  |
|  | 54 (c) | 23811 | 23884 | 74  | tRNA-Met-CAT                                         | Unknown                                                 | tRNA                  | -         | -      |
|  | 55     | 24475 | 25191 | 717 | Phage fibrin (wac)/Phage tail tube (a, b)            | Chaperone involved in tail fiber contractile mechanical | Structure             | 24.988,40 | 20,17% |

|  |        |       |       |      |                                                       |                                       |                       |           |        |
|--|--------|-------|-------|------|-------------------------------------------------------|---------------------------------------|-----------------------|-----------|--------|
|  | 56 (c) | 25427 | 25729 | 303  | Hypothetical protein /Phage NinX                      | Unknown                               | Unknown               | -         | -      |
|  | 57 (c) | 25726 | 25869 | 144  | Hypothetical protein                                  | Unknown                               | Unknown               | -         | -      |
|  | 58 (c) | 25866 | 26060 | 195  | Hypothetical protein                                  | Unknown                               | Unknown               | -         | -      |
|  | 59 (c) | 26093 | 26386 | 294  | Hypothetical protein                                  | Unknown                               | Unknown               | -         | -      |
|  | 60     | 26500 | 27213 | 714  | Hypothetical protein / Tape measure-2 (a, b)          | Unknown                               | Unknown               | -         | -      |
|  | 61     | 27206 | 29548 | 2343 | Phage tail tape measure/ Phage minor tail (a, b)      | Stopping the tail tube polymerization | Structure             | 81.265,10 | 31,30% |
|  | 62     | 29548 | 30021 | 474  | Tail tip L/ Phage minor tail (a, b)                   | Unknown                               | Structure             | 18.095,10 | 36.30% |
|  | 63     | 30021 | 30491 | 471  | Putative structural protein/tail tip (b)              | Unknown                               | Structure             | 17.705,90 | 16,00% |
|  | 64     | 30484 | 30933 | 450  | Putative phage tail /tail tip assembly k (a, b)       | Unknown                               | Unknown               | -         | -      |
|  | 65     | 30887 | 33349 | 2463 | Putative phage tail/ P22 Tailspike protein (a, b)     | Neck/tail attachment                  | Structure             | 91.351,30 | 10,40% |
|  | 66     | 33389 | 35416 | 2028 | Tail-spike/ tail tip assembly k (b)                   | Tail protein                          | Structure             | 72.772,30 | 35,82% |
|  | 67 (c) | 35712 | 36194 | 483  | Single-stranded DNA binding protein                   | DNA binding protein                   | DNA genome metabolism | -         | -      |
|  | 68 (c) | 36198 | 37238 | 1041 | Hipothetical protein/Phage associated recombinase (b) | Recombinase                           | DNA genome metabolism | -         | -      |
|  | 69 (c) | 37256 | 38194 | 939  | Hypothetical protein/ Exodeoxyribonuclease VIII (b)   | Unknown                               | DNA genome metabolism | -         | -      |
|  | 70 (c) | 38191 | 38463 | 273  | Hypothetical protein/tail fibers protein (b)          | Unknown                               | Unknown               | -         | -      |
|  | 71 (c) | 38501 | 38926 | 426  | Hypothetical protein                                  | Unknown                               | Unknown               | -         | -      |
|  | 72 (c) | 38928 | 40853 | 1926 | DNA helicase/Putative ATP dependent helicase (b)      | DNA and RNA metabolism                | Structure             | -         | -      |
|  | 73     | 40929 | 41882 | 954  | DNA primase/helicase (b)                              | DNA and RNA metabolism                | Structure             | -         | -      |
|  | 74 (c) | 41911 | 42216 | 306  | Hypothetical protein                                  | Unknown                               | Unknown               | -         | -      |

|  |        |       |       |      |                                     |         |           |           |        |
|--|--------|-------|-------|------|-------------------------------------|---------|-----------|-----------|--------|
|  | 75 (c) | 42226 | 42417 | 192  | Hypothetical protein                | Unknown | Unknown   | -         | -      |
|  | 76 (c) | 42414 | 43967 | 1554 | DUF3987 protein of unknown function | Unknown | Unknown   | -         | -      |
|  | 77 (c) | 43967 | 44185 | 219  | Hypothetical protein                | Unknown | Unknown   | -         | -      |
|  | 78     | 44641 | 44730 | 90   | Hypothetical protein                | Unknown | Unknown   | -         | -      |
|  | 79     | 44816 | 45010 | 195  | Hypothetical protein                | Unknown | Unknown   | -         | -      |
|  | 80     | 45065 | 45187 | 123  | Hypothetical protein                | Unknown | Unknown   | -         | -      |
|  | 81     | 45191 | 45373 | 183  | Hypothetical protein                | Unknown | Unknown   | -         | -      |
|  | 82     | 45410 | 45643 | 234  | Hypothetical protein                | Unknown | Unknown   | -         | -      |
|  | 83     | 45640 | 46032 | 393  | Hypothetical protein                | Unknown | Unknown   | -         | -      |
|  | 84     | 46096 | 46347 | 252  | Hypothetical protein                | Unknown | Unknown   | -         | -      |
|  | 85     | 46340 | 46456 | 117  | Hypothetical protein                | Unknown | Unknown   | -         | -      |
|  | 86     | 46449 | 46628 | 180  | Hypothetical protein/holin (b)      | Unknown | Unknown   | -         | -      |
|  | 87     | 46615 | 46788 | 174  | Hypothetical protein/DUF5681 (b)    | Unknown | Unknown   | -         | -      |
|  | 88     | 46936 | 47355 | 420  | DUF5681(a, b)                       | Unknown | Structure | 15.622,80 | 19,40% |
|  | 89     | 47348 | 47483 | 135  | Hypothetical protein                | Unknown | Unknown   | -         | -      |

(a) Identification by mass spectrometry, (b) HHpred prediction, (c) Reverse gene drive. The color keys (previously used in the genetic map, Figure 3) correspond to: Terminase (yellow) capsid proteins (green); lysozyme (black); CDSs and hypothetical proteins (grey); tail proteins (red).
