# Supplementary material for: Novel Salmonella Phage, vB_Sen_STGO-35-1, Characterization and Evaluation in Chicken Meat
Source: MDPI journal article supplement (doi:10.3390/microorganisms10030606), 2022-03-12
Supplement: s1 [file s1]

**Table S2.** Transduction frequency of phage STGO 35-1.

| Volume of phage Inoculation<br>(Concentration) | Frequency of P22 HT <i>int</i> phage <sup>(2)</sup> | Frequency of STGO 35-1 phage <sup>(1)</sup> |
|------------------------------------------------|-----------------------------------------------------|---------------------------------------------|
| 0                                              | 0                                                   | 0                                           |
| 1 µl (10 <sup>8</sup> PFU/mL)                  | 2x10 <sup>-6</sup>                                  | 0                                           |
| 5 µl (10 <sup>8</sup> PFU/mL)                  | 6x10 <sup>-6</sup>                                  | 0                                           |
| 20 µl (10 <sup>8</sup> PFU/mL)                 | 3x10 <sup>-5</sup>                                  | 0                                           |

<sup>1</sup> Transduction frequency was calculated as CFU/PFU.

<sup>2</sup> P22 HT *int* Phage donor, is a transducer phage of *Salmonella* spp. that was used as a positive control.  
S. Typhimurium 14028s donor of a resistance gene.
