# Supplementary material for: Novel Salmonella Phage, vB_Sen_STGO-35-1, Characterization and Evaluation in Chicken Meat
Source: MDPI journal article supplement (doi:10.3390/microorganisms10030606), 2022-03-12
Supplement: s1 [file s1]

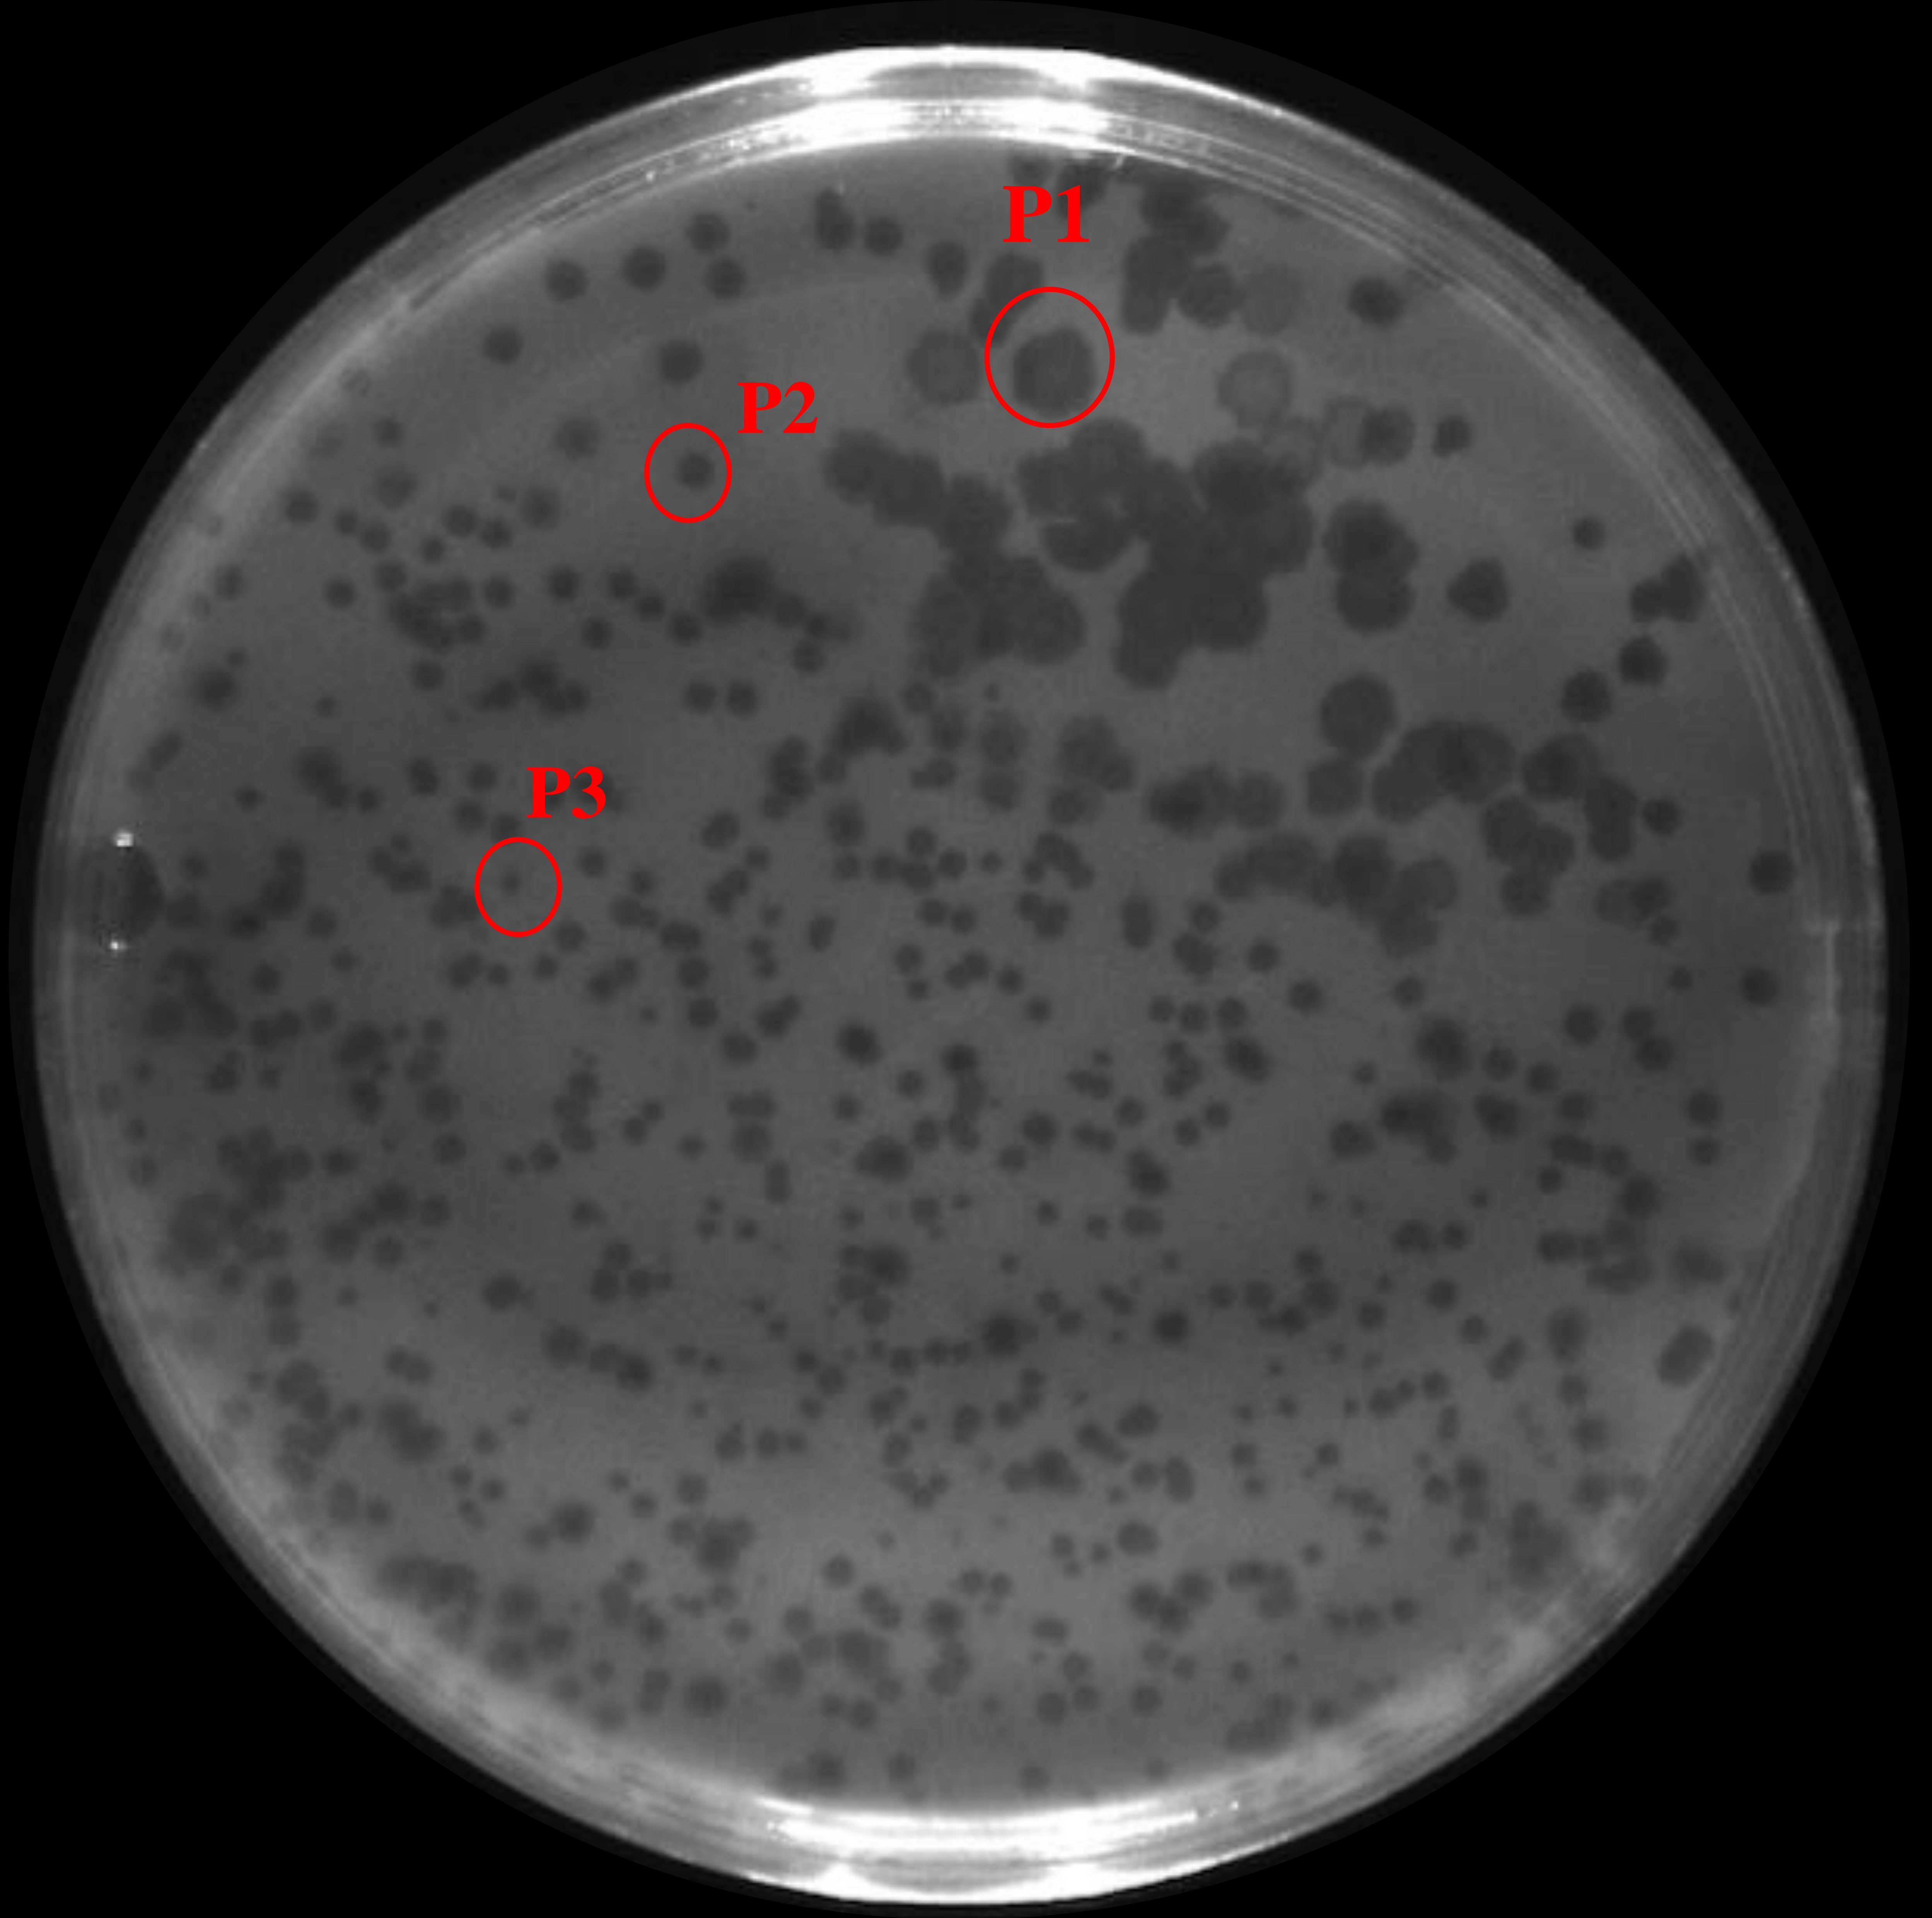

**Figure S5.** Morphological plaque obtained from selections of phage exposed to *S. Enteritidis*. The selected morphologically different plaques are marked in red;
