# Supplementary figures and images for: Novel Salmonella Phage, vB_Sen_STGO-35-1, Characterization and Evaluation in Chicken Meat
Source: MDPI journal article supplement (doi:10.3390/microorganisms10030606), 2022-03-12

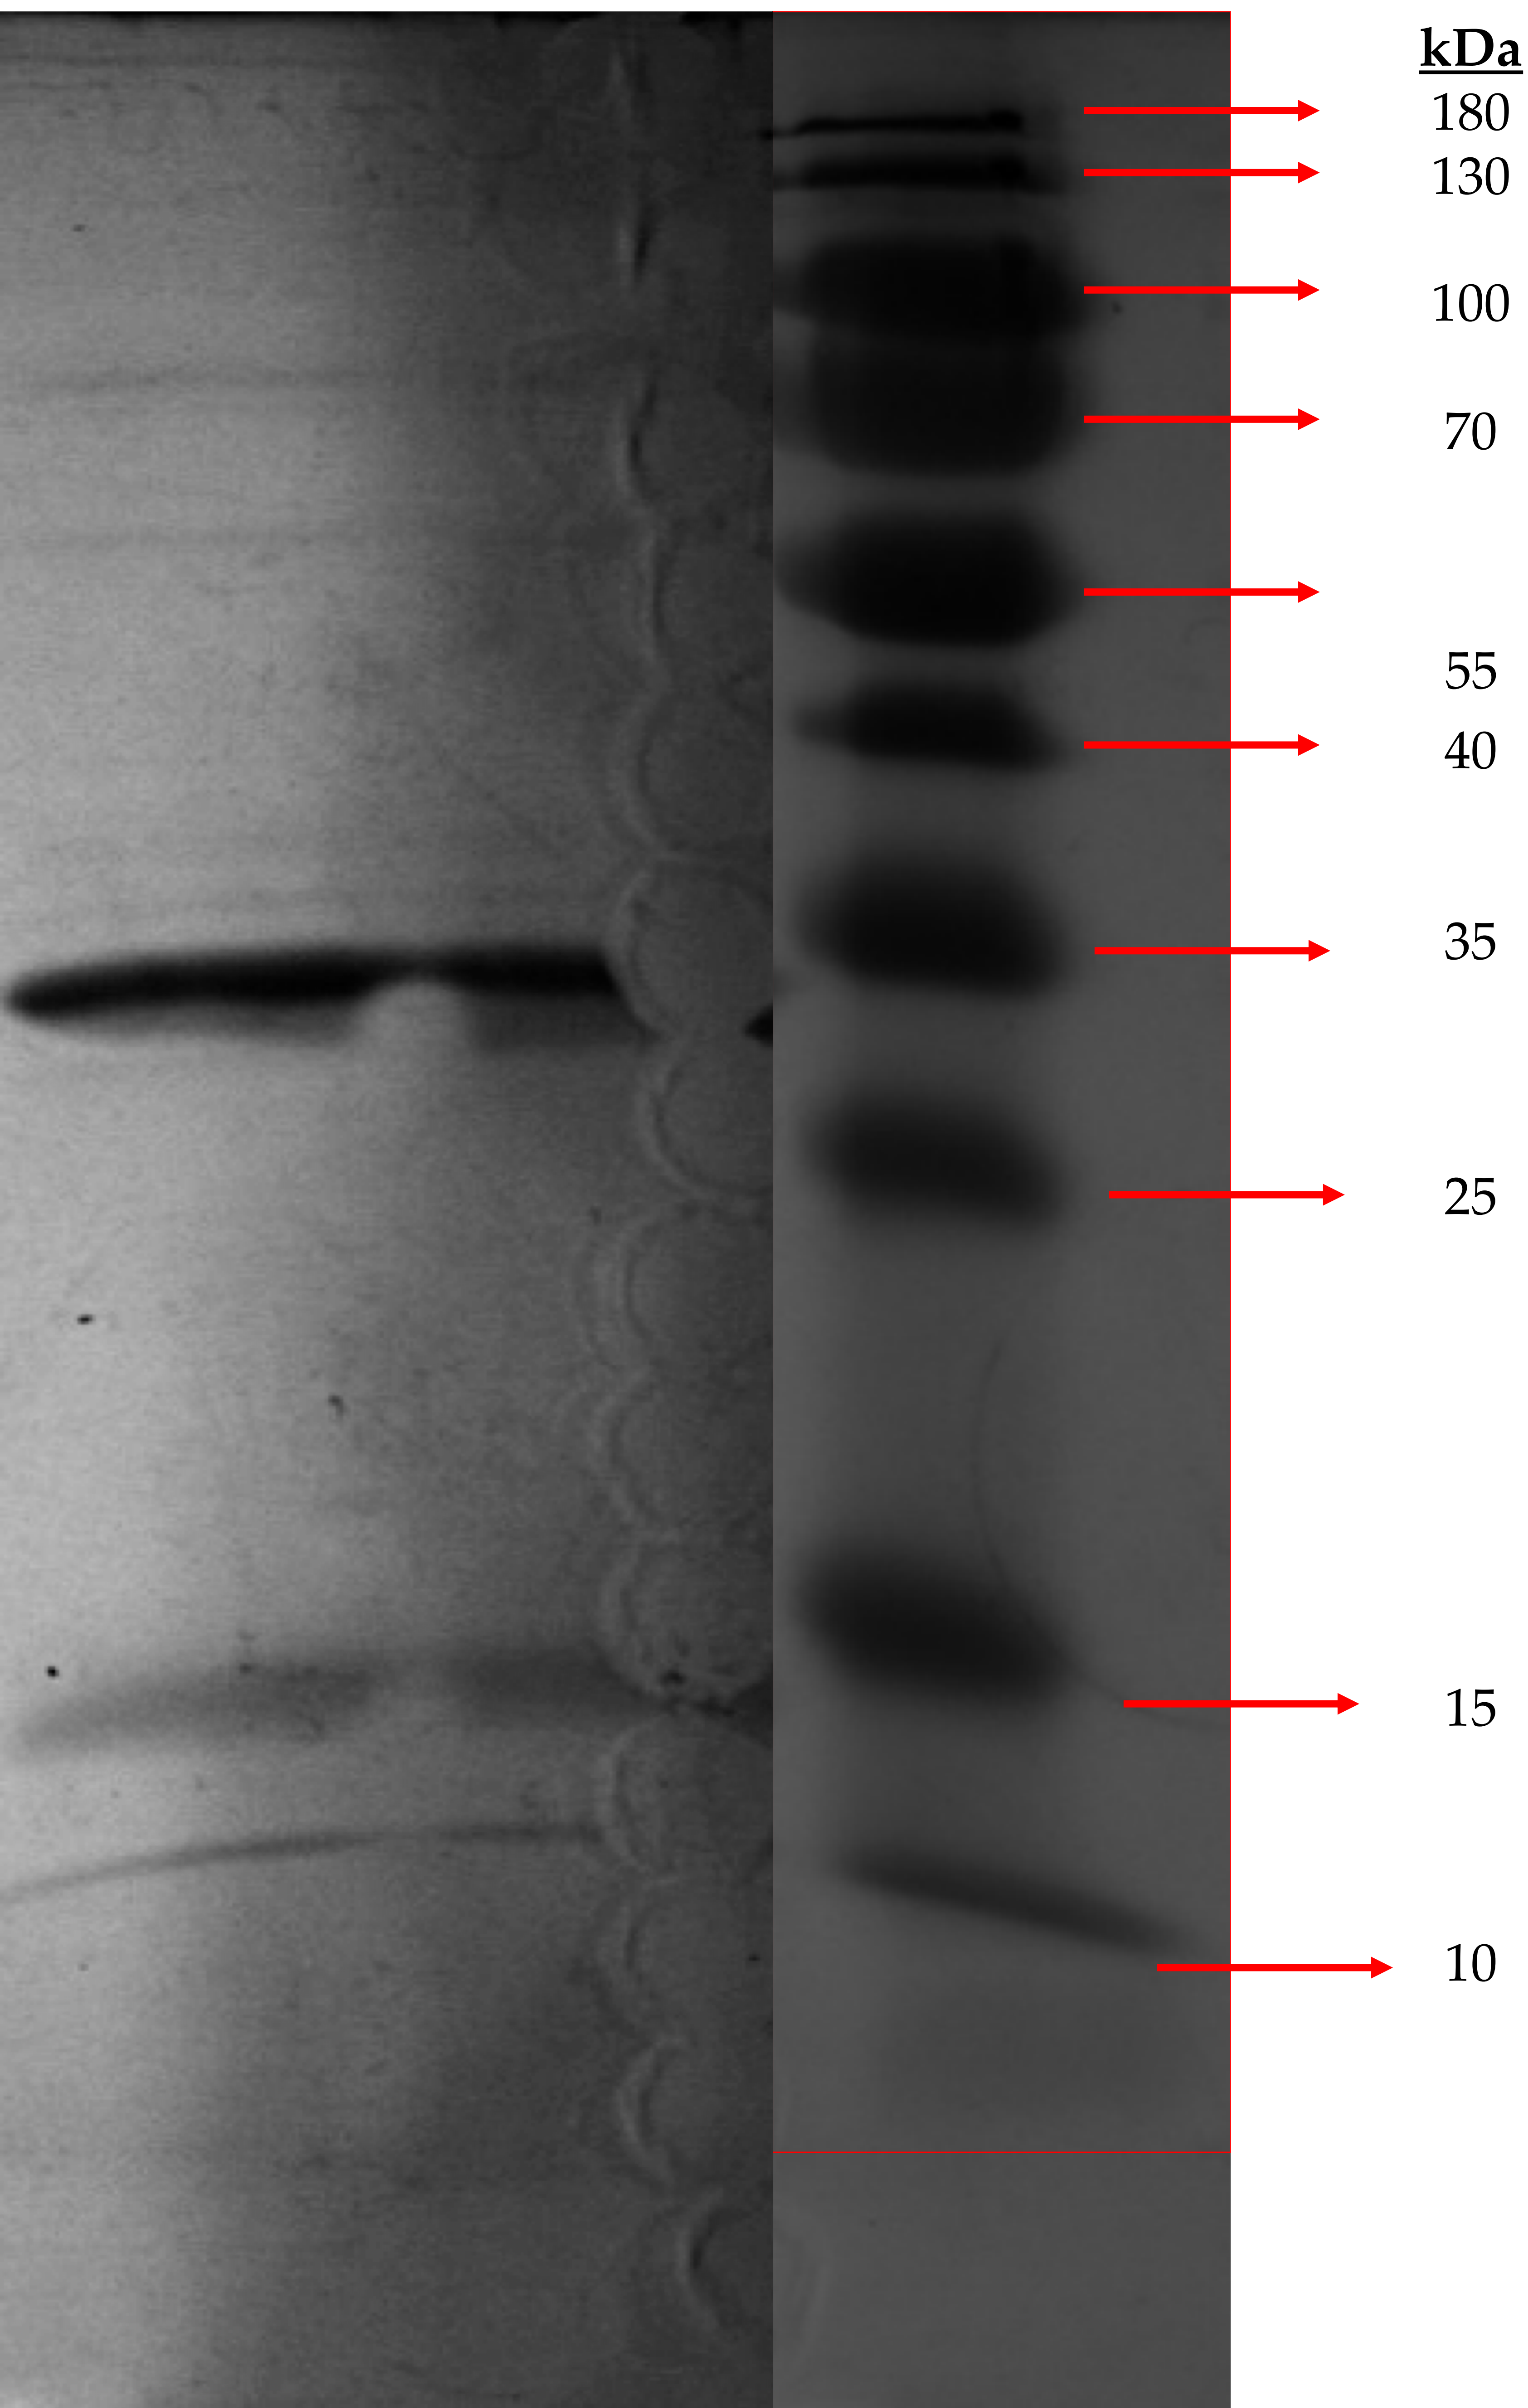

**Figure S3.** SDS-PAGE analysis of phage structural proteins.

Supplement: s1 [file s1]
